# Supplementary material
Source: publisher figshare collection journal article supplement (https://karger.figshare.com/articles/dataset/_/4747660)
Supplement: Supplementary file 1 [file 1]

**Table S3.** Correlation between per-individual observed heterozygosity and genomic inbreeding coefficient estimates.

| Geographic region  | Number of individuals | <i>r</i> | <i>P</i>               |
|--------------------|-----------------------|----------|------------------------|
| World              | 5,043                 | -0.537   | $<10^{-16}$            |
| Africa             | 2,336                 | -0.523   | $<10^{-16}$            |
| Middle East        | 281                   | -0.854   | $<10^{-16}$            |
| Europe             | 169                   | -0.475   | $6.79 \times 10^{-11}$ |
| Central/South Asia | 630                   | -0.729   | $1.39 \times 10^{-10}$ |
| East Asia          | 247                   | -0.425   | $1.63 \times 10^{-11}$ |
| Oceania            | 688                   | -0.792   | $9.79 \times 10^{-14}$ |
| Americas           | 338                   | -0.657   | $<10^{-16}$            |
| Afro-European      | 113                   | -0.955   | $<10^{-16}$            |
| Latino             | 241                   | -0.436   | $8.62 \times 10^{-12}$ |
