# Supplementary material
Source: publisher figshare collection journal article supplement (https://karger.figshare.com/articles/dataset/_/4747660)
Supplement: Supplementary file 2 [file 1]

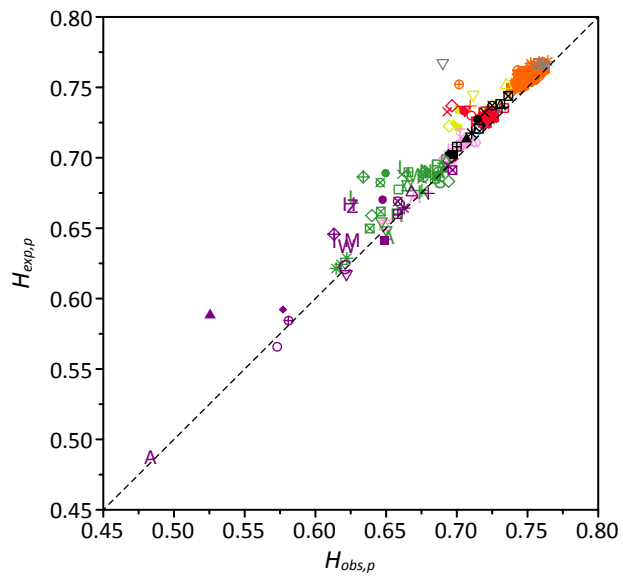

**Figure S2.** Expected versus observed heterozygosity across populations ( $r=0.975$ ,  $P<10^{-16}$ ). Populations are indicated by the same symbols as in **Figure 3**. The black dashed line depicts the identity line.
