# Supplementary material
Source: publisher figshare collection journal article supplement (https://karger.figshare.com/articles/dataset/_/4747660)
Supplement: Supplementary file 3 [file 1]

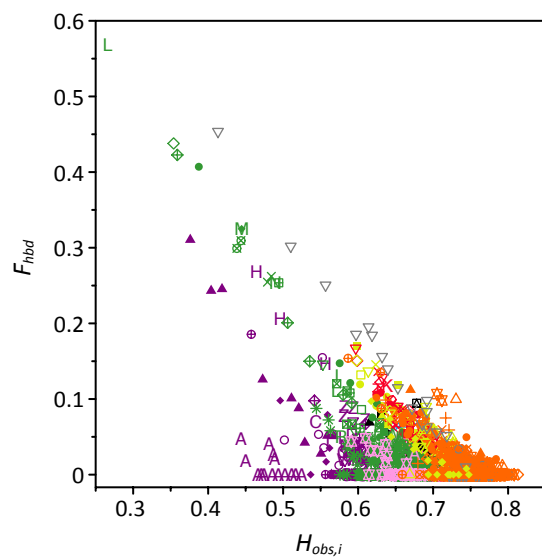

**Figure S1.** Relationship between per-individual inbreeding coefficient and observed heterozygosity estimates. A scatterplot is shown of the relationship across individuals of  $H_{obs,i}$  and  $F_{hbd}$ . Individuals are indicated by the same symbols as in **Figure 3**. The black dashed line depicts the regression line. Pearson correlation coefficients appear in **Table S3**.
